# Supplementary material for: Assessment of Pollution-Health-Economics Nexus in China
Source: Copernicus journal article supplement (doi:10.5194/acp-2018-484), 2018-06-06
Supplement: Supplementary file [file acp-2018-484-AC3-supplement.pdf]

## Response to Comments from R1 - 2 nd round

I recommend publication after some minor changes:

1. Reply to the authors' response to the specific comment NO.2: Thanks for explaining this. I believe other readers also want to have this information. Please provide it in the Supplement text.

Thank you for your comments. We have added these explanation to Method section as *'We need to clarify that the industries can express very different levels of dependencies on capital and labour in reality. However, percentage reductions in labour time were used as a direct indicator for percentage reduction in industrial value added due to the assumption of production expansion path underlying input-output model. An input-output model assumes that proportional increase in industrial output can be only achieved by simultaneous increases in both capital and labour, indicating that any reduction in an input can directly constrain the output growth in all industries.'* and to Supporting Information S1.3 A 'Circular Economy' in Input-Output Analysis as *'It worth noting that IO model possesses a fundamental assumption of production expansion path that assumes proportional increase in industrial output can be only achieved by simultaneous increases in both capital and labour, indicating that any reduction in an input can directly constrain the output growth in all industries.'*

2. Reply to the authors' response to the specific comment NO.6: "includes" should be "including".

Thank you for your comments. We have corrected the word.
